# Supplementary material for: Solid Fe Resources Separated from Rolling Oil Sludge for CO Oxidation
Source: MDPI journal article supplement (doi:10.3390/ijms232012134), 2022-10-12
Supplement: s1 [file s1]

Supporting information for

Solid Fe Resources Separated from Rolling Oil Sludge  
for CO Oxidation

*Wei Gao <sup>†</sup>, Sai Tang <sup>†</sup>, Ting Wu, Jianhong Wu, Kai Cheng <sup>\*</sup> and Mingguixia <sup>\*</sup>*

(Hubei Key Laboratory of Biomass Fibers and Eco-dyeing & Finishing, School of  
Chemistry and Chemical Engineering, Wuhan Textile University, Wuhan 430200,  
China)

<sup>\*</sup> Corresponding authors: Kai Cheng, E-mail: kcheng55@126.com;

Mingguixia, E-mail: mingguixia1@163.com.

<sup>†</sup> The two authors have equal contribution as the first author

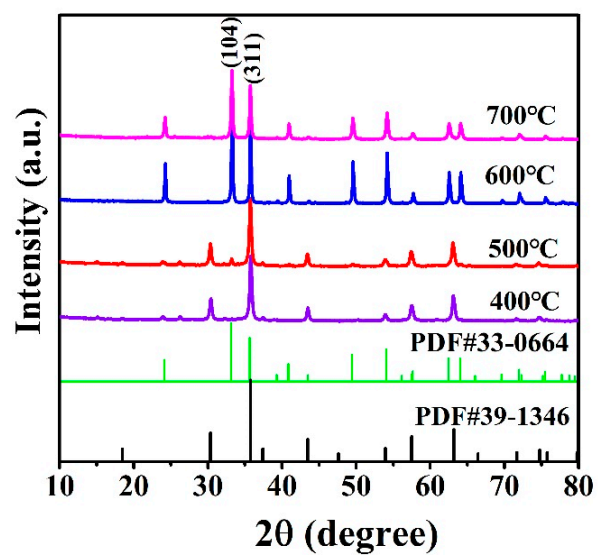

**Figure S1.** XRD patterns of Fe<sub>2</sub>O<sub>3</sub>-H under different calcination temperatures

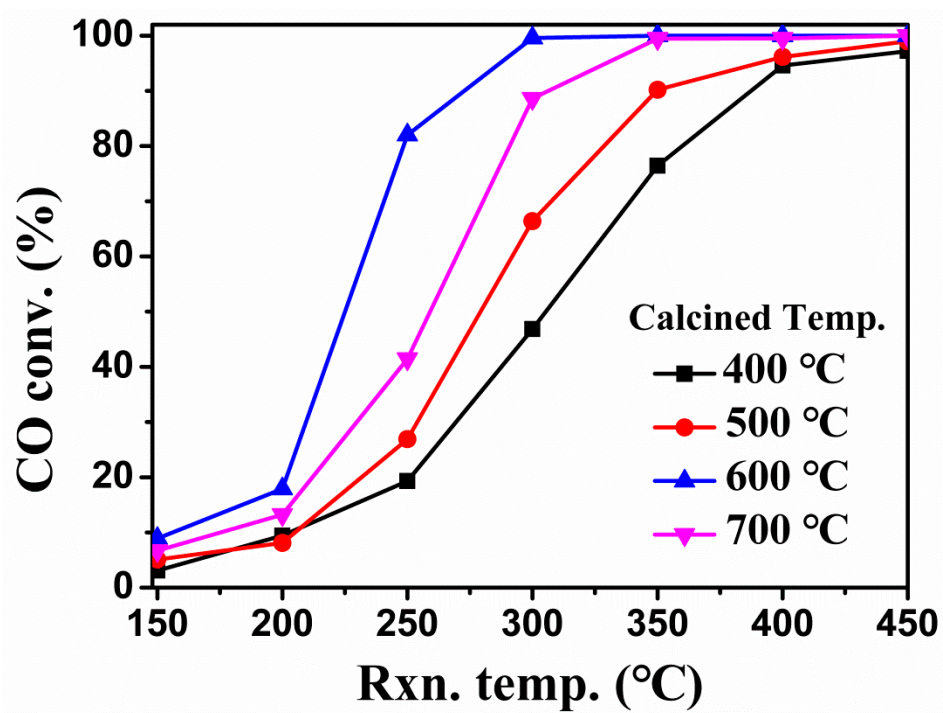

**Figure S2.** Effect of different calcination temperatures on CO oxidation activity over Fe<sub>2</sub>O<sub>3</sub>-H sample

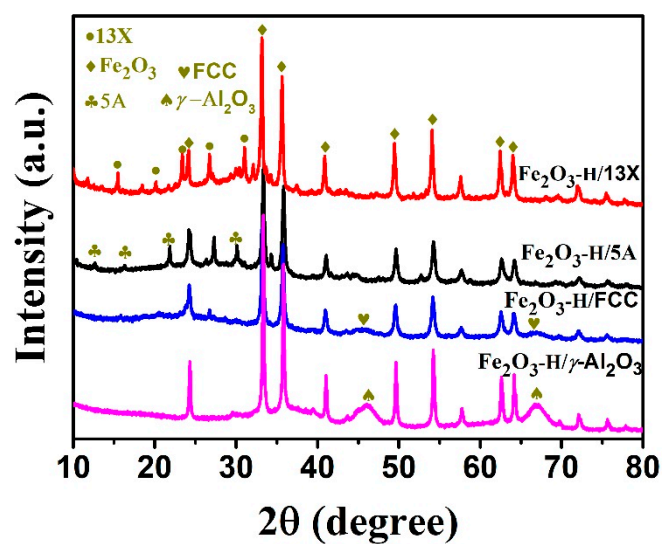

**Figure S3.** XRD patterns of Fe<sub>2</sub>O<sub>3</sub>-H supported on 13X, 5A, FCC and γ-Al<sub>2</sub>O<sub>3</sub> carriers.

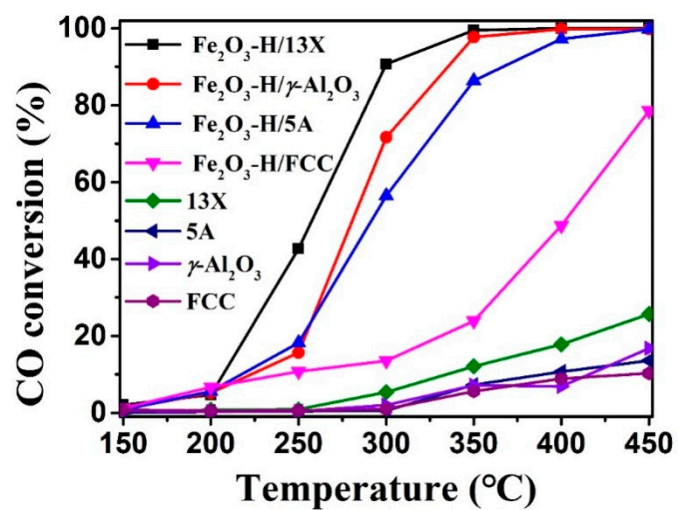

**Figure S4.** Effect of different supports on CO oxidation activity over supported-Fe<sub>2</sub>O<sub>3</sub>-H catalysts

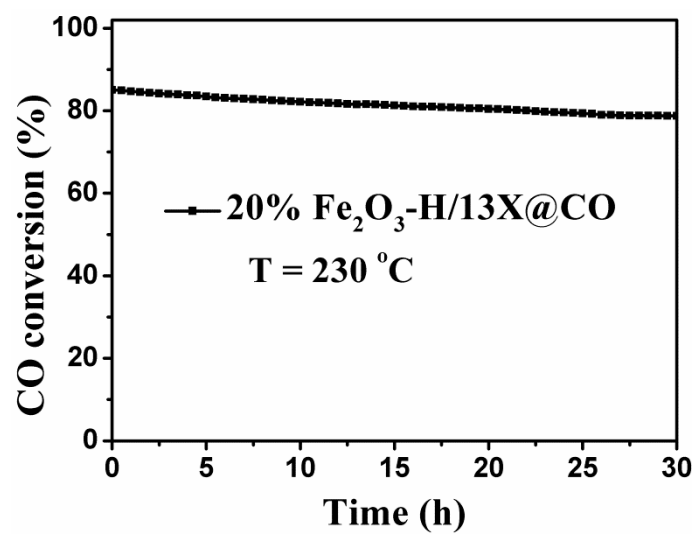

**Figure S5.** Evolution of CO conversion on the 20% Fe<sub>2</sub>O<sub>3</sub>-H/13X@CO at 230 °C during 30 h
